# Supplementary material for: Principal Component Analysis (PCA) of Molecular Descriptors for Improving Permeation through the Blood–Brain Barrier of Quercetin Analogues
Source: MDPI journal article supplement (doi:10.3390/ijms25010192), 2023-12-22
Supplement: s1 [file s1]

**Table S1.** VolSurf+ molecular descriptors on intrinsic solubility (SOLY) and Caco-2 cell permeability (CACO2).

| No. | Compound     | SOLY   | CACO2   |
|-----|--------------|--------|---------|
| 1   | ZINC03869685 | -2.399 | -0.8823 |
| 2   | ZINC03874317 | -2.237 | -1.1370 |
| 3   | ZINC05784821 | -2.293 | -1.0994 |
| 4   | ZINC04098600 | -2.471 | -0.8578 |
| 5   | ZINC06520226 | -2.790 | -0.7962 |
| 6   | ZINC14436449 | -2.267 | -1.0666 |
| 7   | ZINC06484604 | -2.782 | -0.7663 |
| 8   | ZINC00039111 | -2.633 | -0.6158 |
| 9   | ZINC06525297 | -2.327 | -1.0619 |
| 10  | ZINC03869768 | -2.755 | -0.6433 |
| 11  | ZINC00517261 | -3.012 | -0.7081 |
| 12  | ZINC03875620 | -2.976 | -0.5747 |
| 13  | ZINC00057845 | -2.626 | -0.3732 |
| 14  | ZINC04731234 | -2.756 | -0.7602 |
| 15  | ZINC01645590 | -3.280 | -0.3501 |
| 16  | ZINC06018683 | -3.291 | -0.4031 |
| 17  | ZINC00120273 | -2.691 | -0.1319 |
| 18  | ZINC05998785 | -2.778 | -0.6876 |
| 19  | ZINC06483609 | -3.227 | -0.7331 |
| 20  | ZINC06483700 | -3.415 | -0.4361 |
| 21  | ZINC06403375 | -3.534 | -0.3873 |
| 22  | ZINC00039321 | -2.584 | -0.0568 |
| 23  | ZINC03881558 | -2.661 | -0.9236 |
| 24  | ZINC06411540 | -3.234 | -0.3518 |
| 25  | ZINC00057752 | -2.712 | -0.1557 |
| 26  | ZINC06536276 | -2.404 | -0.8625 |
| 27  | ZINC05998596 | -3.743 | -0.4022 |
| 28  | ZINC00008662 | -2.528 | -0.5212 |
| 29  | ZINC02146994 | -3.677 | -0.1951 |
| 30  | ZINC05732763 | -3.286 | -0.4251 |
| 31  | ZINC48057104 | -2.273 | -0.7936 |
| 32  | ZINC05733650 | -3.281 | -0.4477 |
| 33  | ZINC05640267 | -3.988 | -0.0879 |
| 34  | ZINC14644239 | -2.512 | -0.6833 |
| 35  | ZINC06095498 | -2.656 | -0.4165 |
